# Supplementary material
Source: ML conference proceedings conference paper supplement (https://openreview.net/forum?id=ZsySJqavh3)

Berkeley-Stanford Web Densities

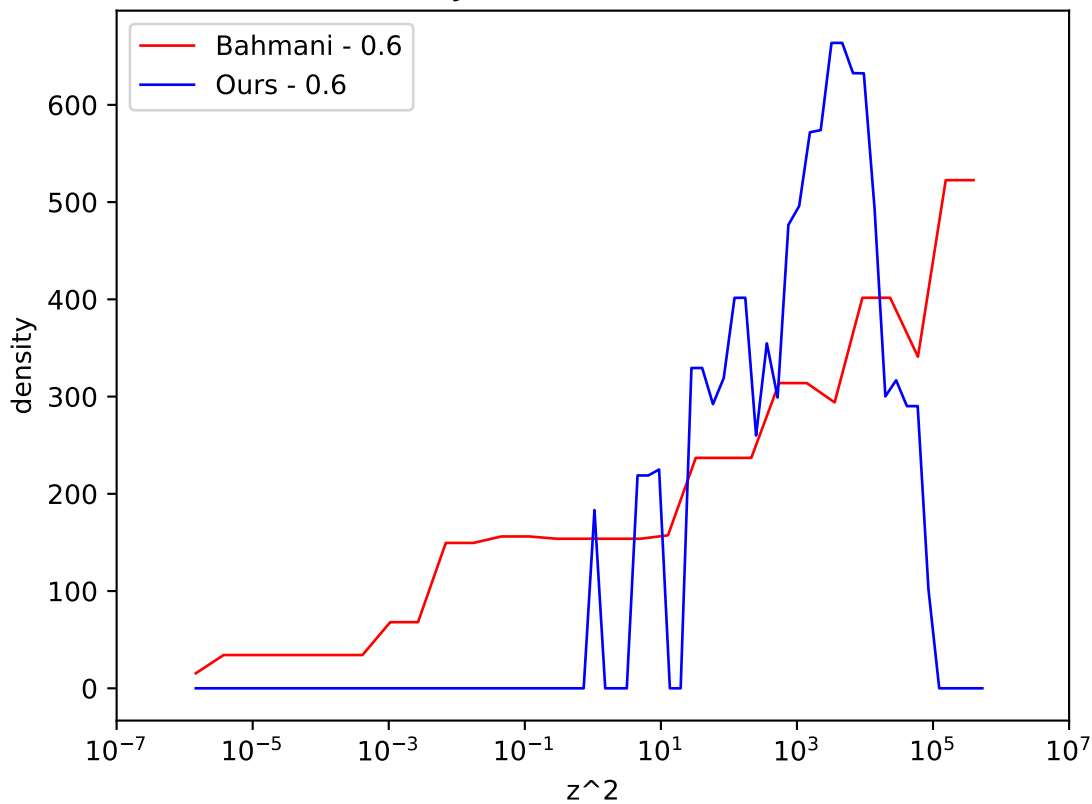

Supplement: supplementary_material [file berkeley-den-mpc.pdf › DSExperiments/Results/berkeley-den-mpc.pdf]

Berkeley-Stanford Web (Randomized) Densities

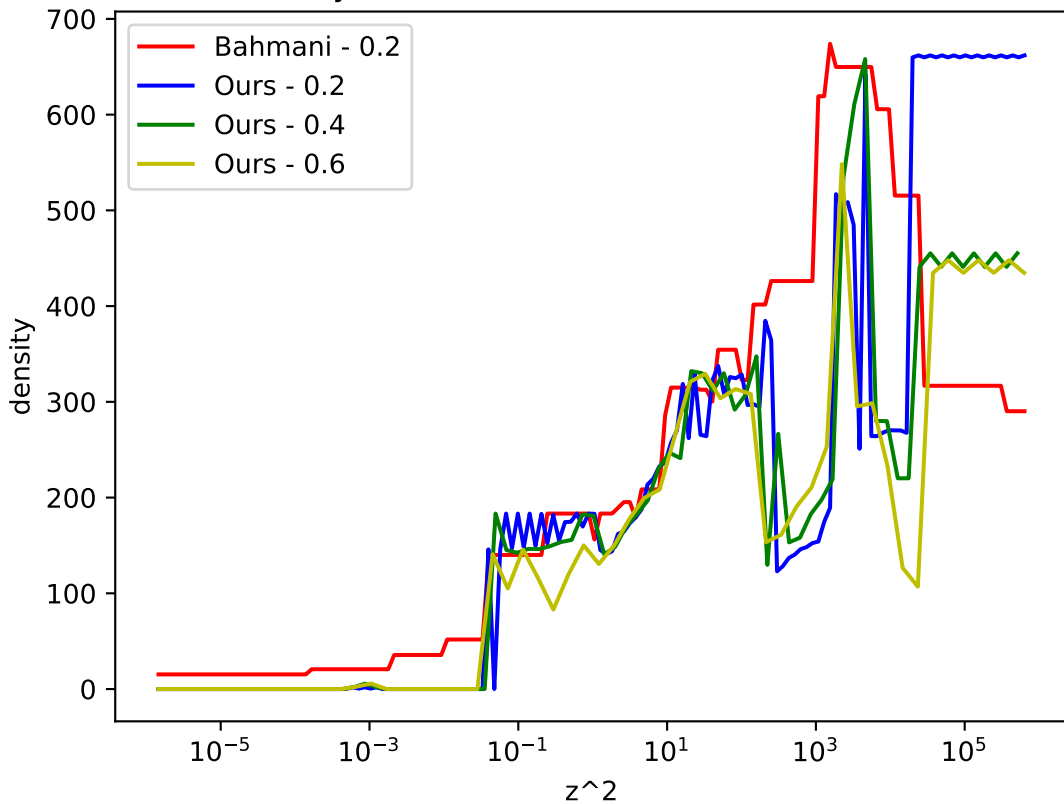

Supplement: supplementary_material [file berkeley-den-randomized.pdf › DSExperiments/Results/berkeley-den-randomized.pdf]

Berkeley-Stanford Web Densities

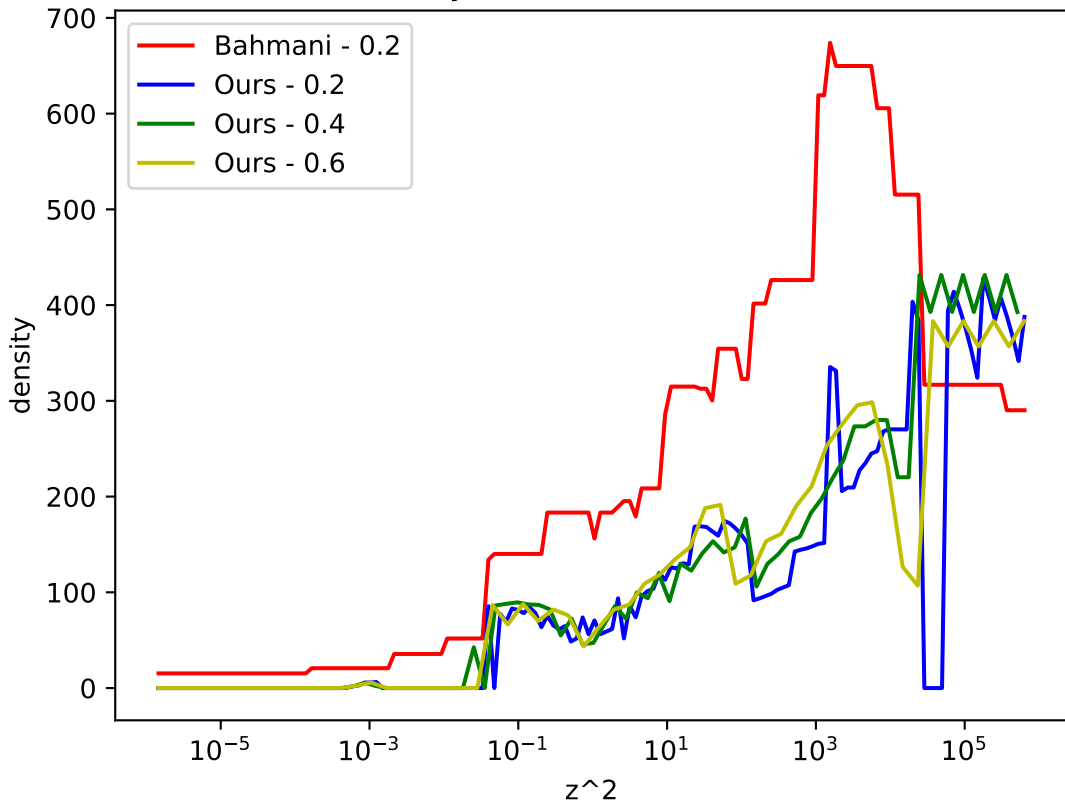

Supplement: supplementary_material [file berkeley-den.pdf › DSExperiments/Results/berkeley-den.pdf]

Berkeley-Stanford Web Rounds

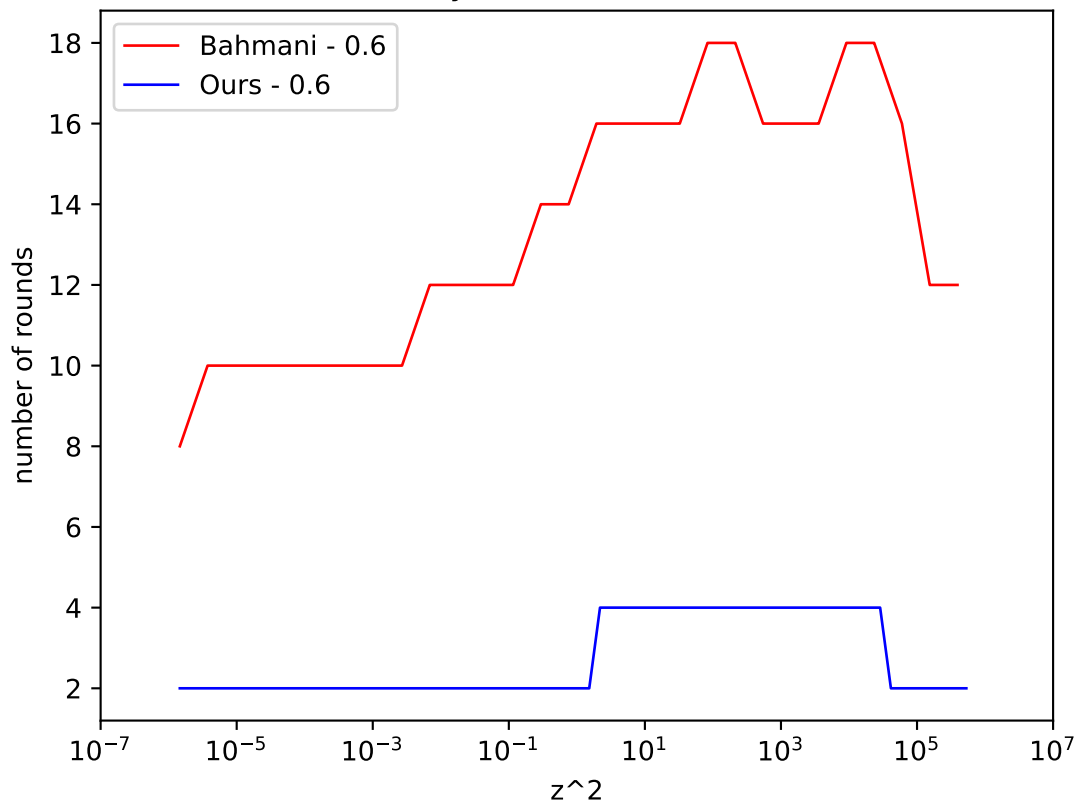

Supplement: supplementary_material [file berkeley-rounds-mpc.pdf › DSExperiments/Results/berkeley-rounds-mpc.pdf]

Berkeley-Stanford Web Times for  $c = 1000$

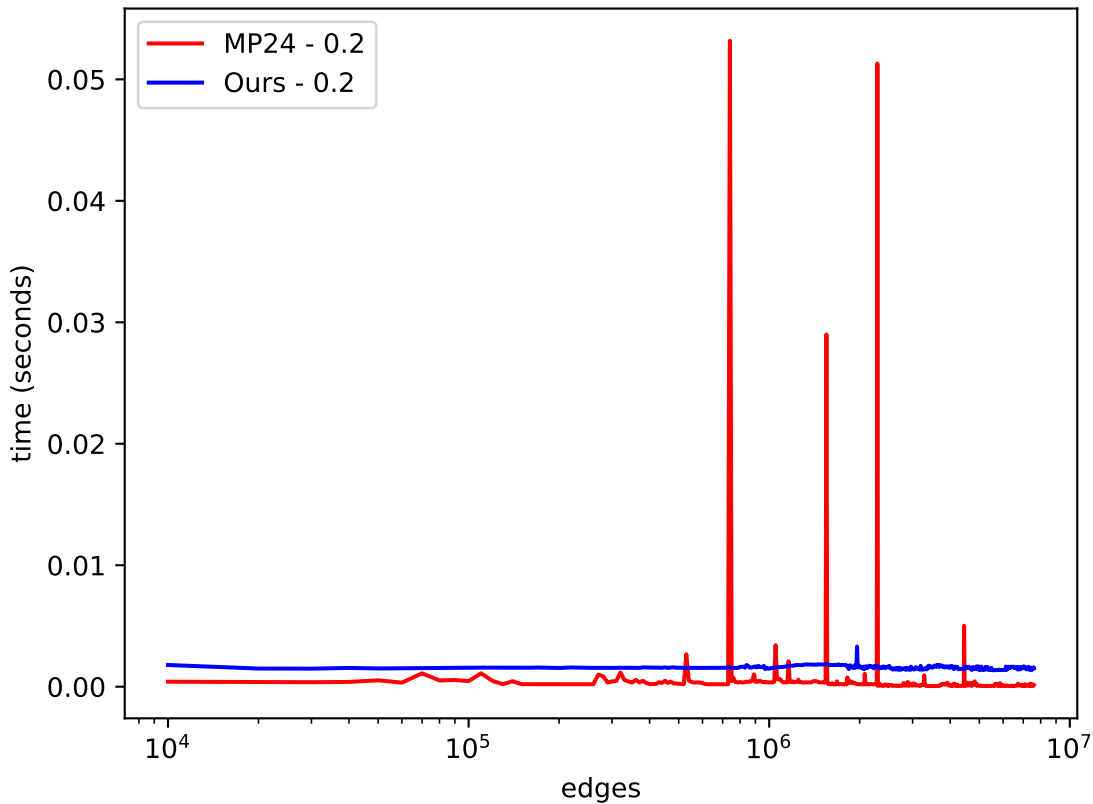

Supplement: supplementary_material [file berkeley-time-1000.pdf › DSExperiments/Results/berkeley-time-1000.pdf]

## Google Web Densities

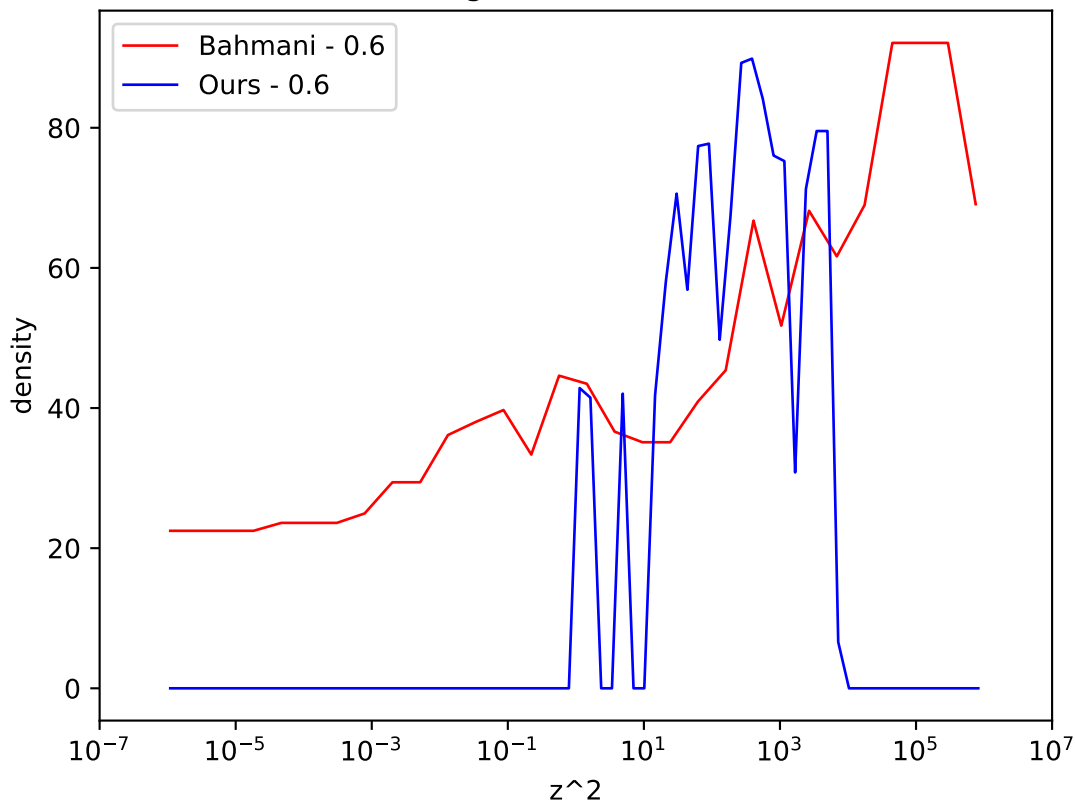

Supplement: supplementary_material [file google-den-mpc.pdf › DSExperiments/Results/google-den-mpc.pdf]

Google Web (Randomized) Densities

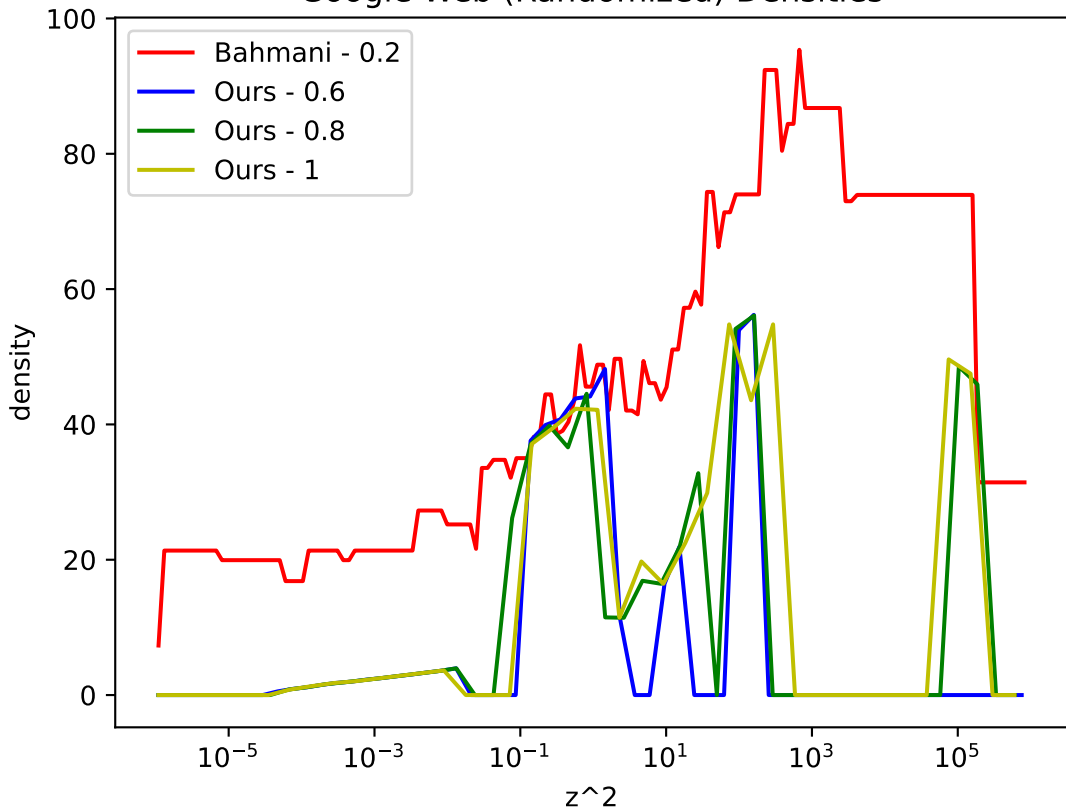

Supplement: supplementary_material [file google-den-randomized.pdf › DSExperiments/Results/google-den-randomized.pdf]

# Google Web Densities

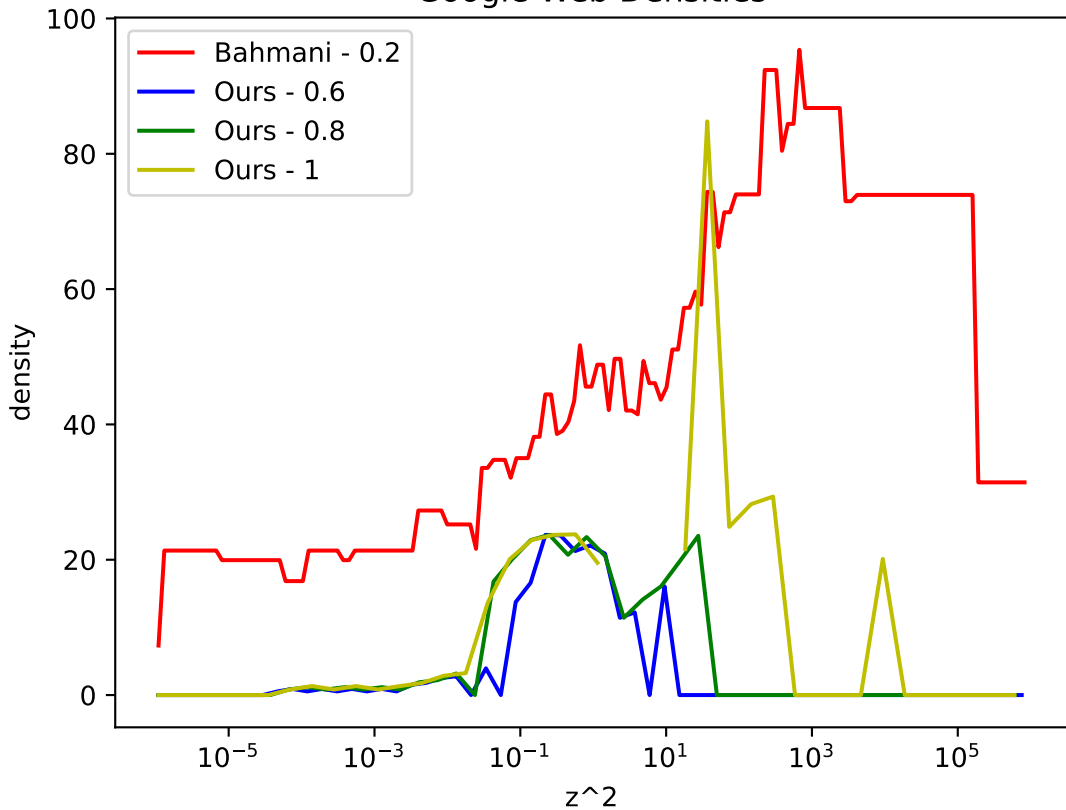

Supplement: supplementary_material [file google-den.pdf › DSExperiments/Results/google-den.pdf]

Google Web Rounds

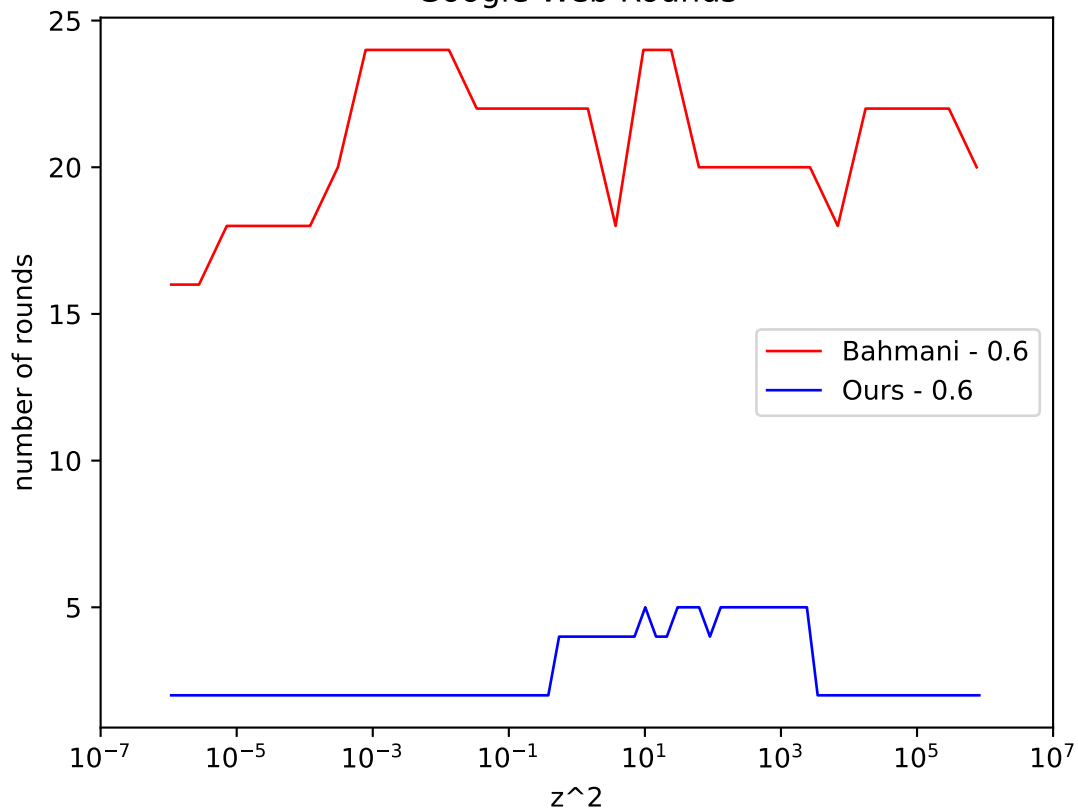

Supplement: supplementary_material [file google-rounds-mpc.pdf › DSExperiments/Results/google-rounds-mpc.pdf]

Google Web Times for  $c = 1000$

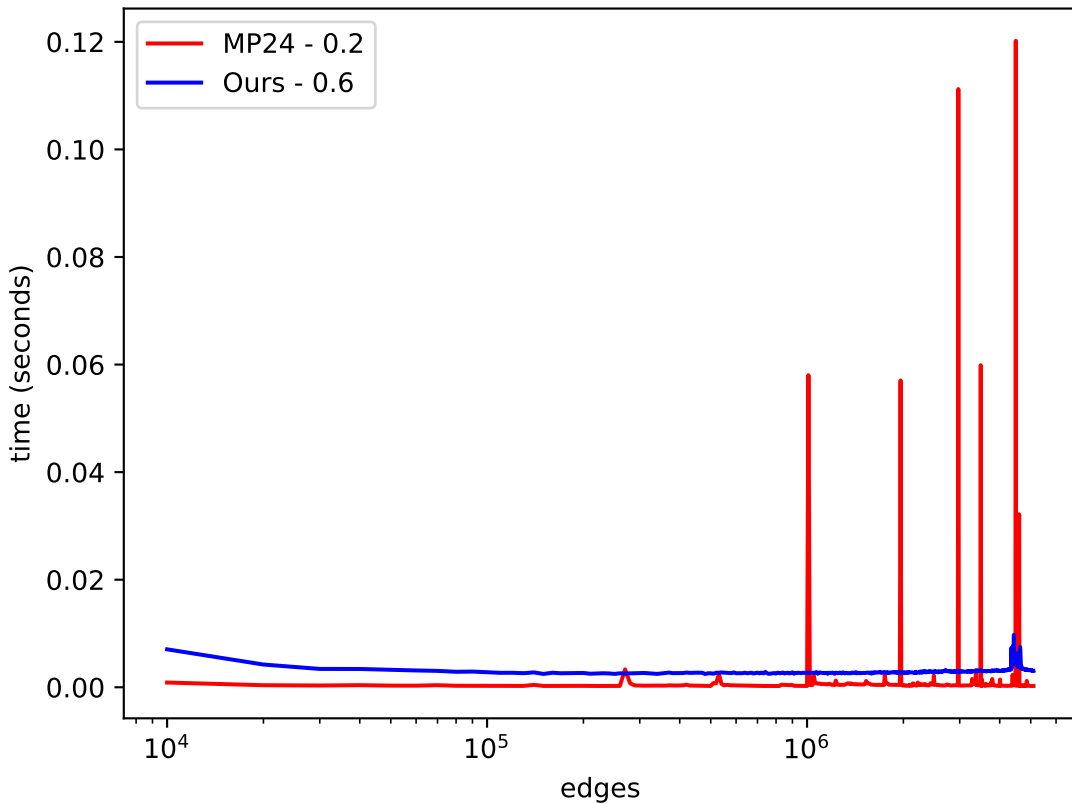

Supplement: supplementary_material [file google-time-1000.pdf › DSExperiments/Results/google-time-1000.pdf]

LiveJournal (Randomized) Densities

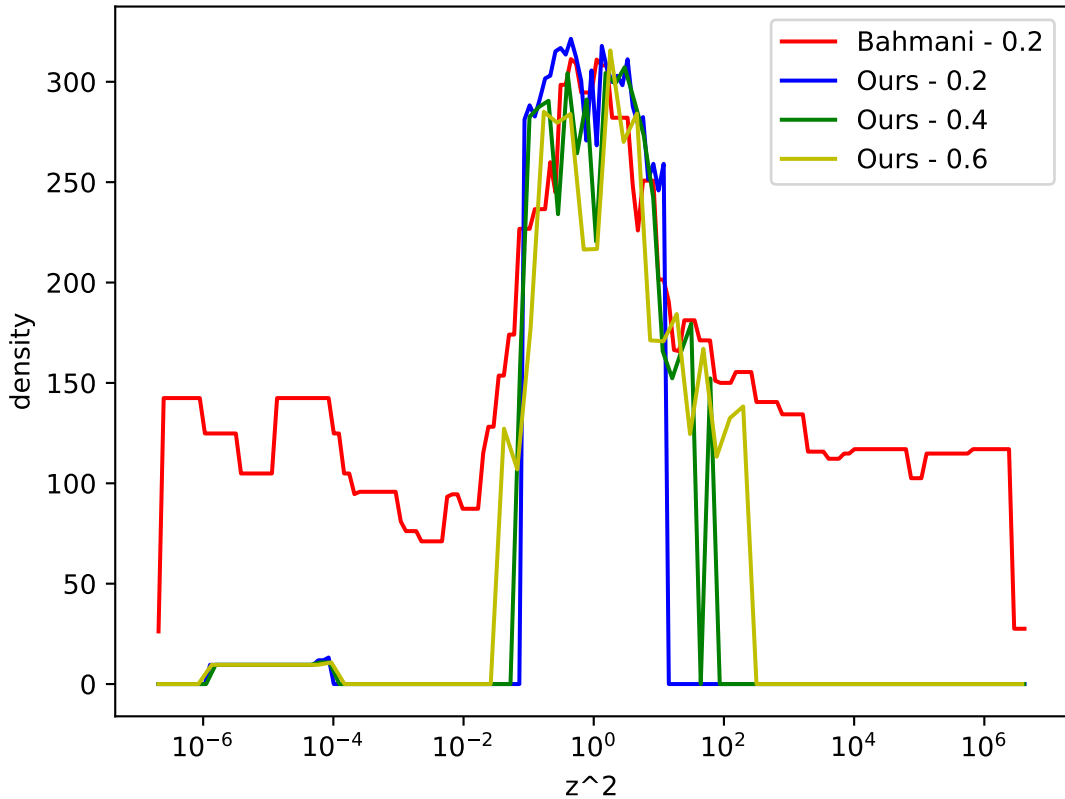

Supplement: supplementary_material [file live-den-randomized.pdf › DSExperiments/Results/live-den-randomized.pdf]

LiveJournal Densities

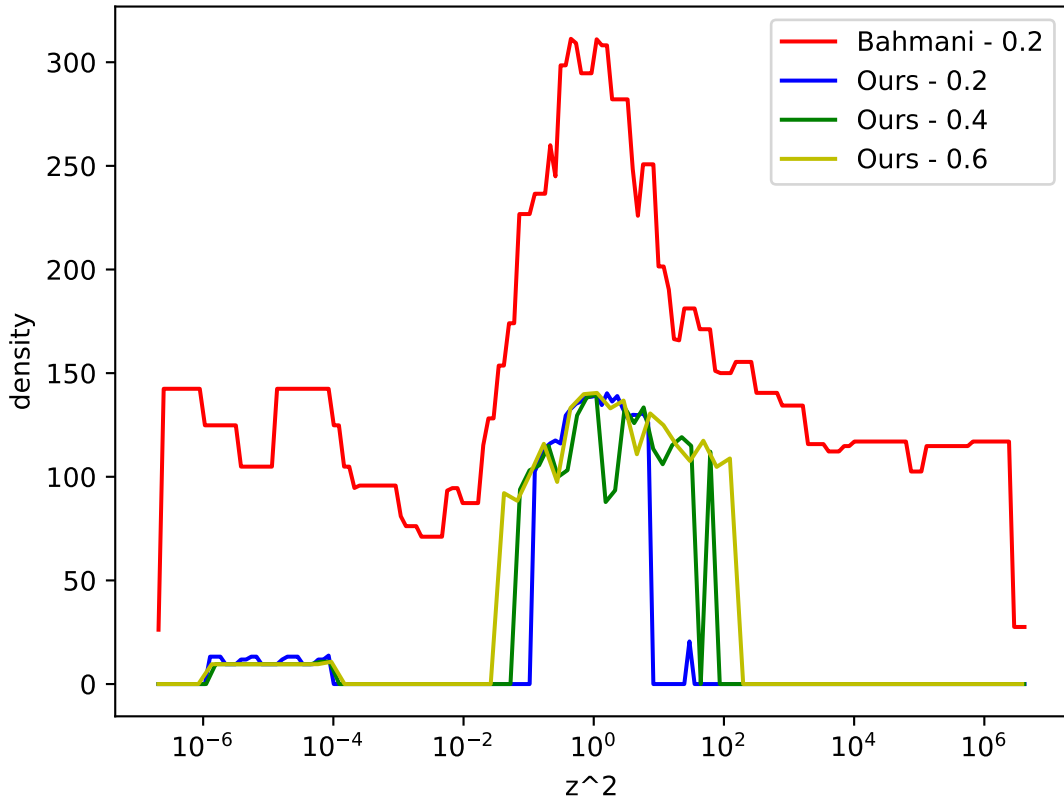

Supplement: supplementary_material [file live-den.pdf › DSExperiments/Results/live-den.pdf]

LiveJournal Times for  $c = 1$

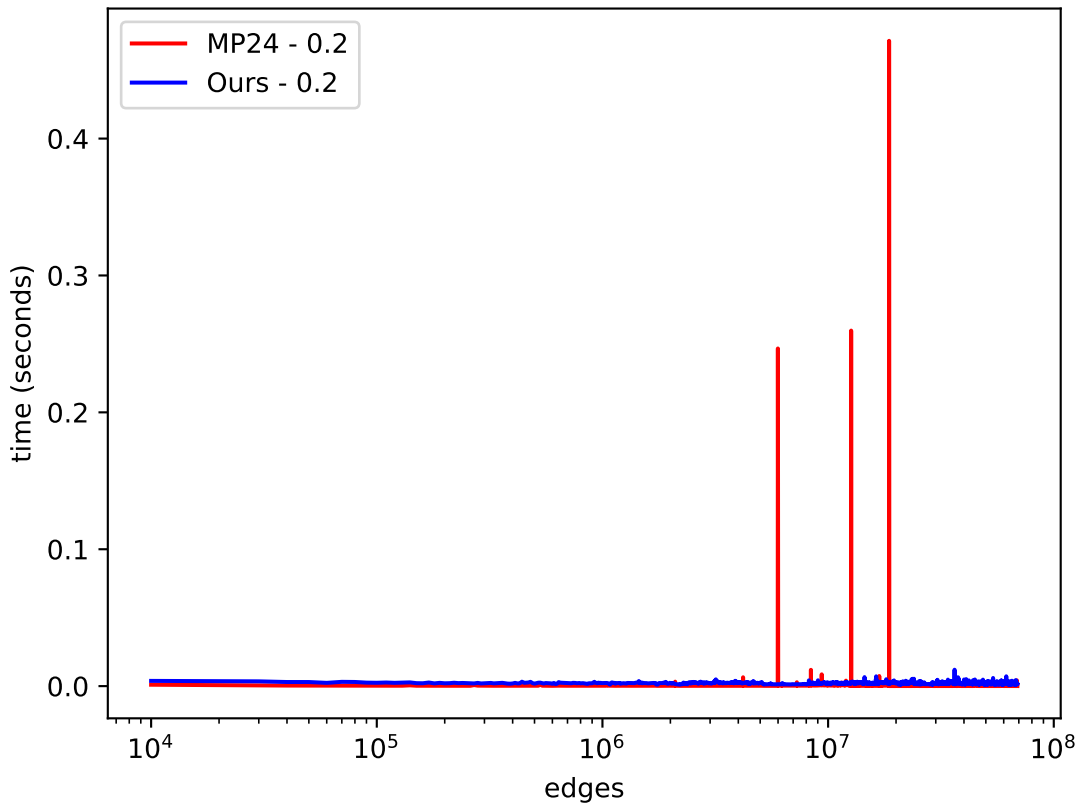

Supplement: supplementary_material [file live-time-1.pdf › DSExperiments/Results/live-time-1.pdf]

Pokec (Randomized) Densities

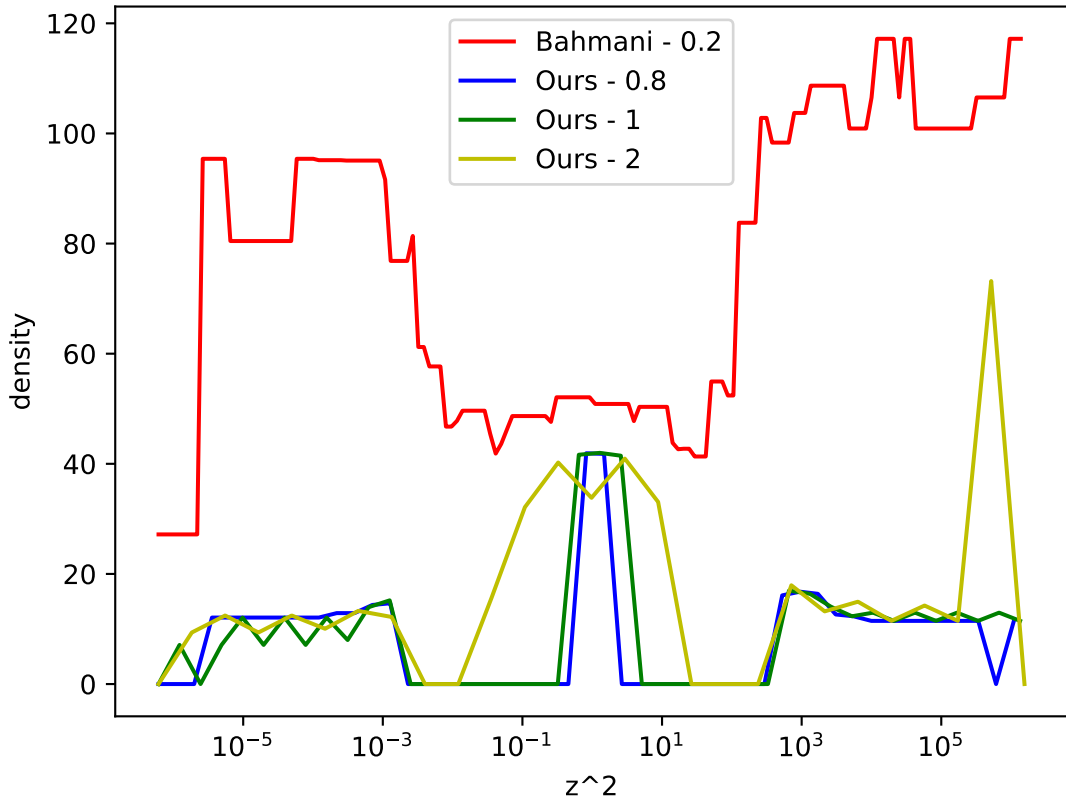

Supplement: supplementary_material [file pokec-den-randomized.pdf › DSExperiments/Results/pokec-den-randomized.pdf]

Pokec Densities

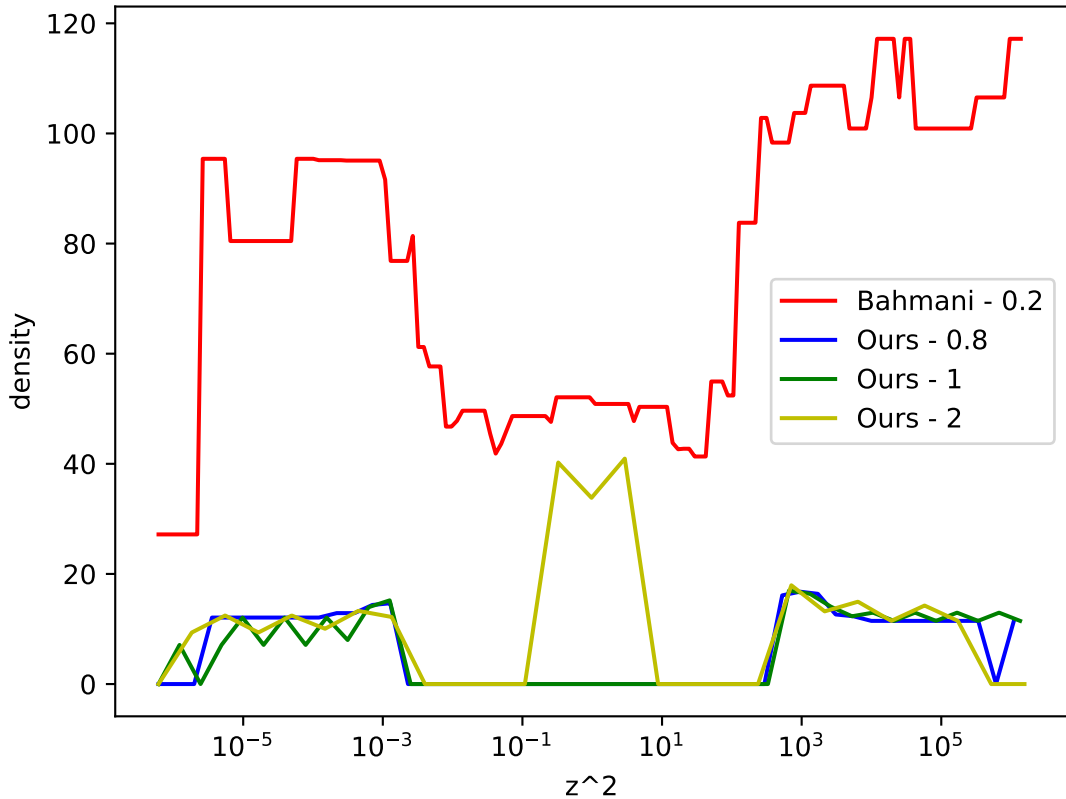

Supplement: supplementary_material [file pokec-den.pdf › DSExperiments/Results/pokec-den.pdf]

Pokec Times for  $c = 10000$

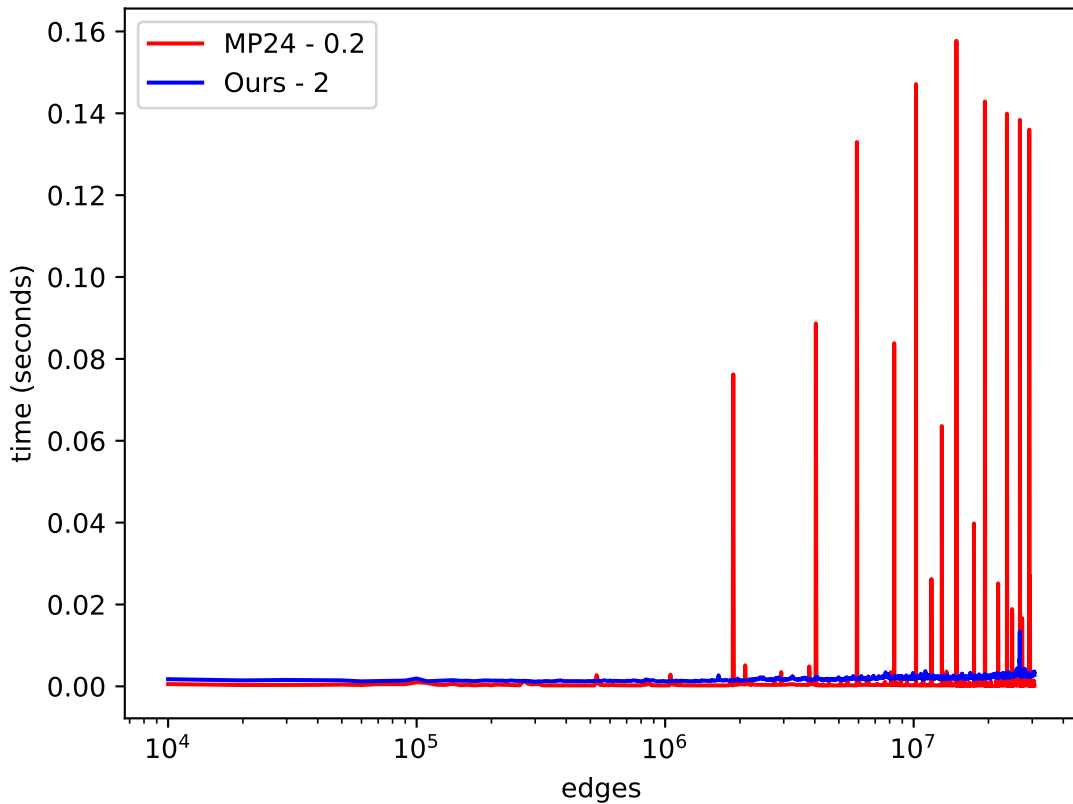

Supplement: supplementary_material [file pokec-time-10000.pdf › DSExperiments/Results/pokec-time-10000.pdf]

# Slashdot Densities

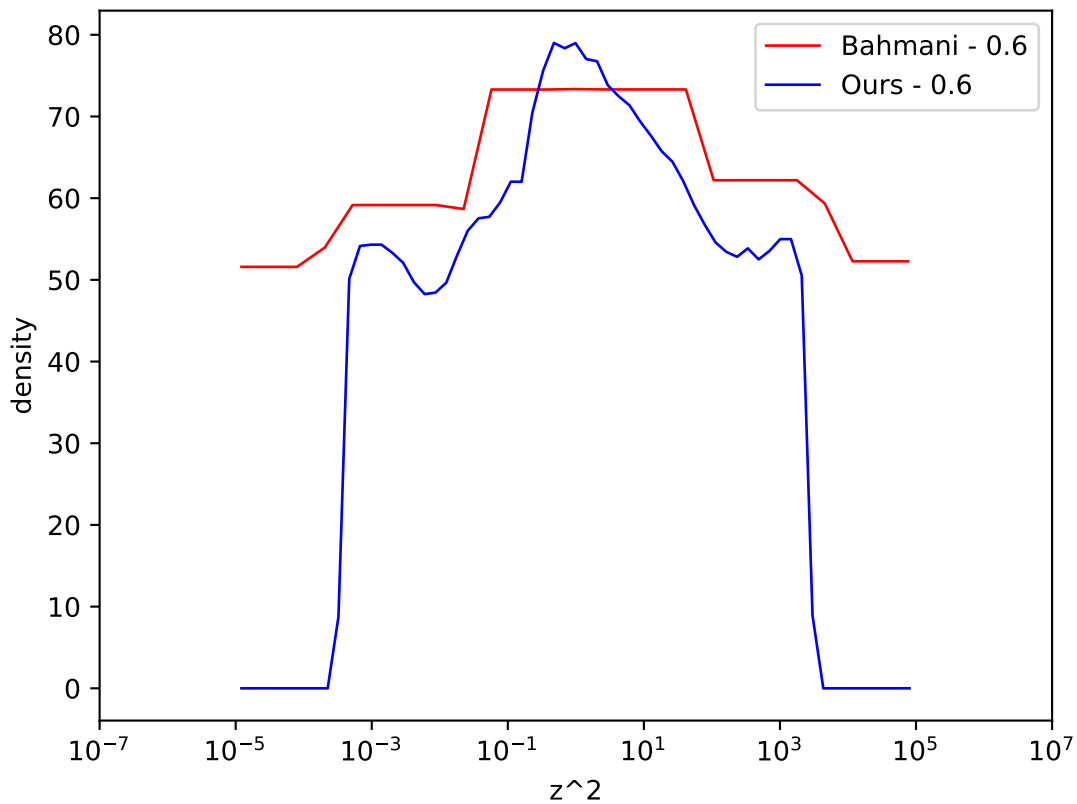

Supplement: supplementary_material [file slash-den-mpc.pdf › DSExperiments/Results/slash-den-mpc.pdf]

Slashdot (Randomized) Densities

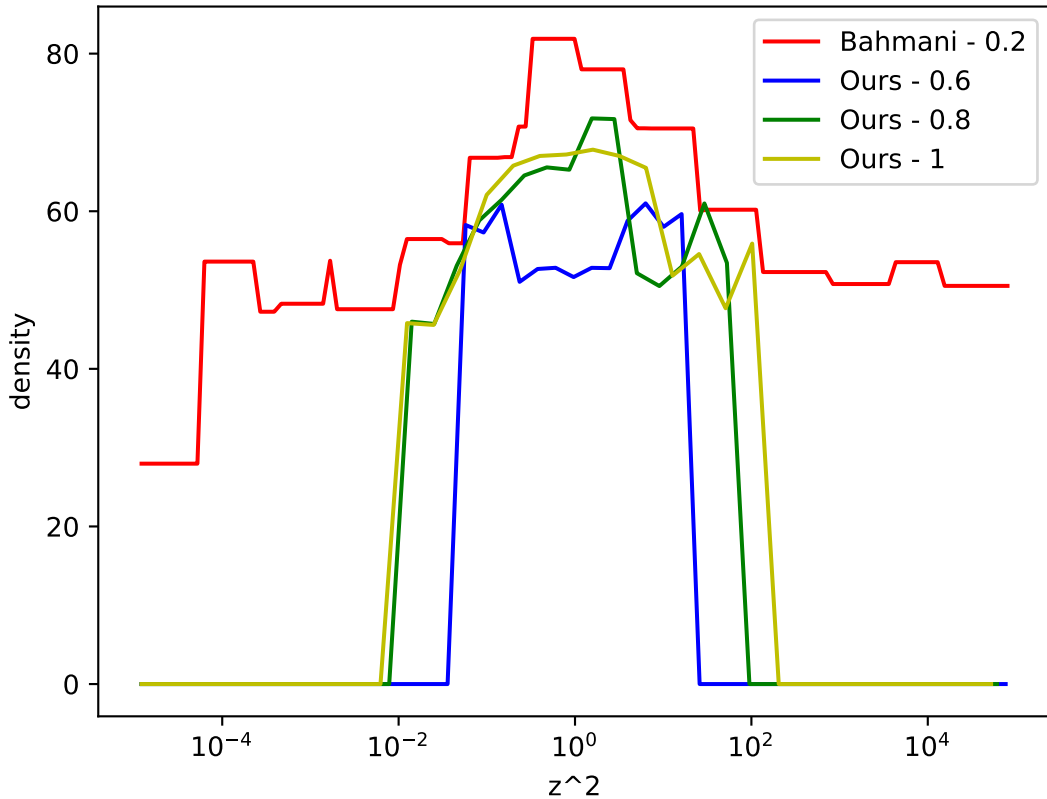

Supplement: supplementary_material [file slash-den-randomized.pdf › DSExperiments/Results/slash-den-randomized.pdf]

# Slashdot Densities

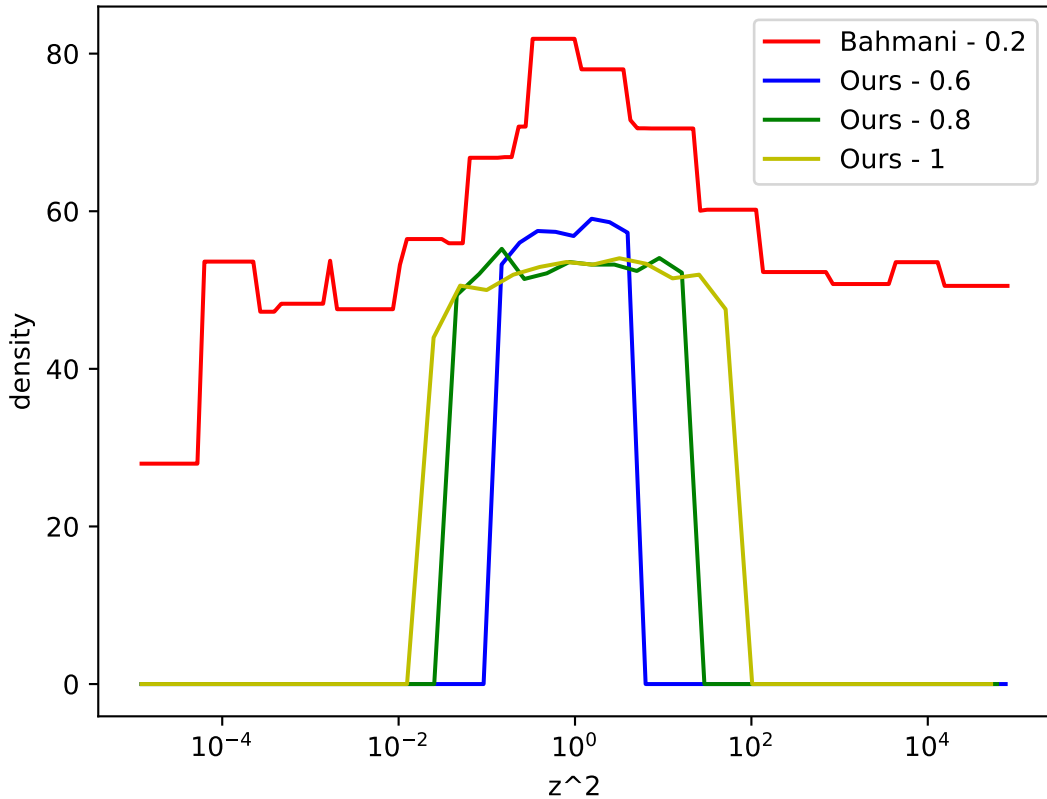

Supplement: supplementary_material [file slash-den.pdf › DSExperiments/Results/slash-den.pdf]

## Slashdot Rounds

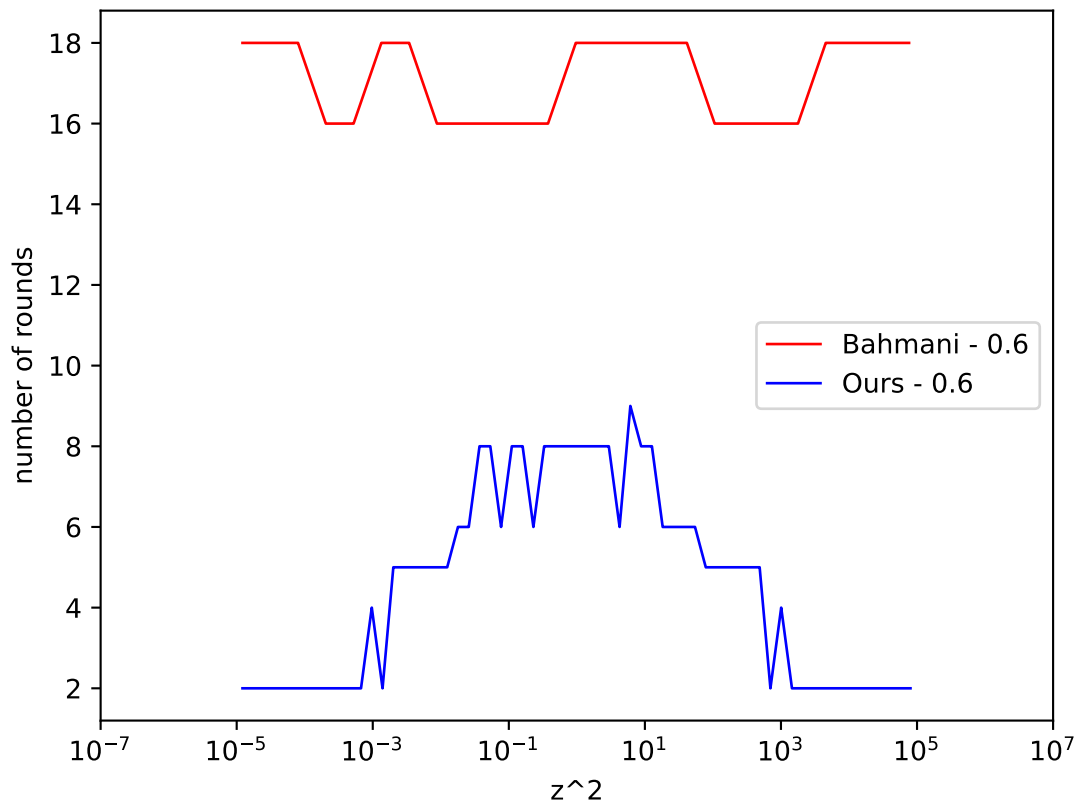

Supplement: supplementary_material [file slash-rounds-mpc.pdf › DSExperiments/Results/slash-rounds-mpc.pdf]

Slashdot Times for  $c = 1$

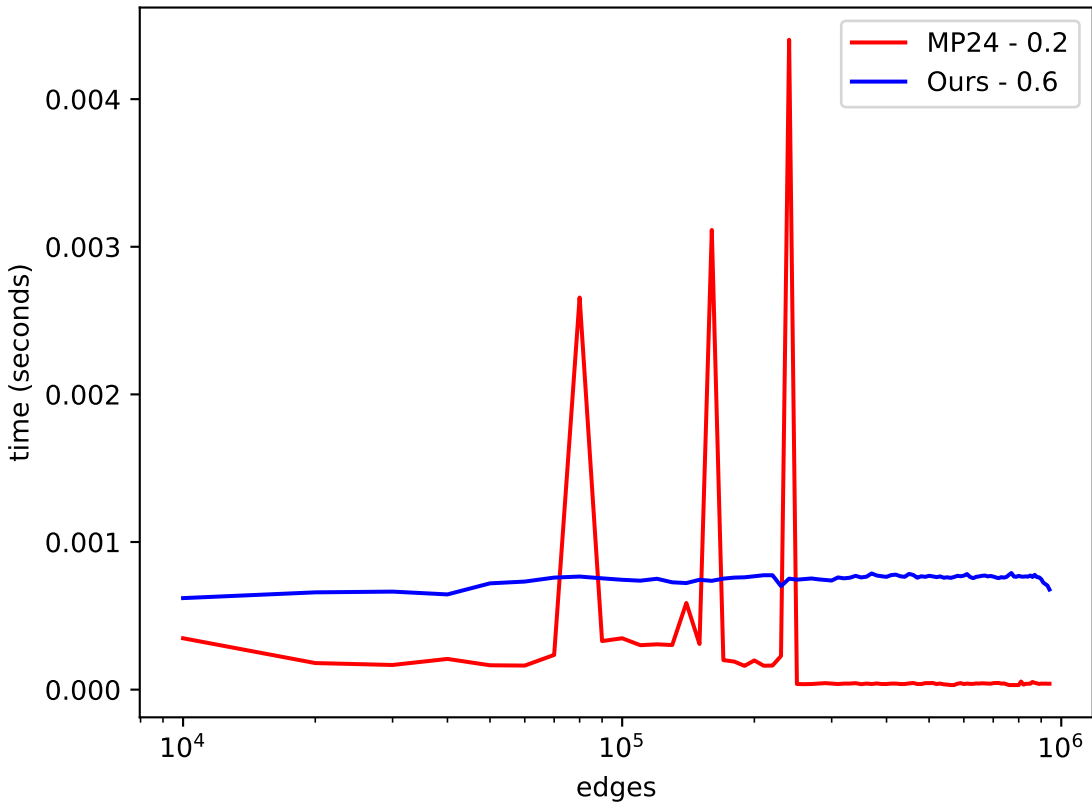

Supplement: supplementary_material [file slash-time-1.pdf › DSExperiments/Results/slash-time-1.pdf]

Stack Overflow Densities

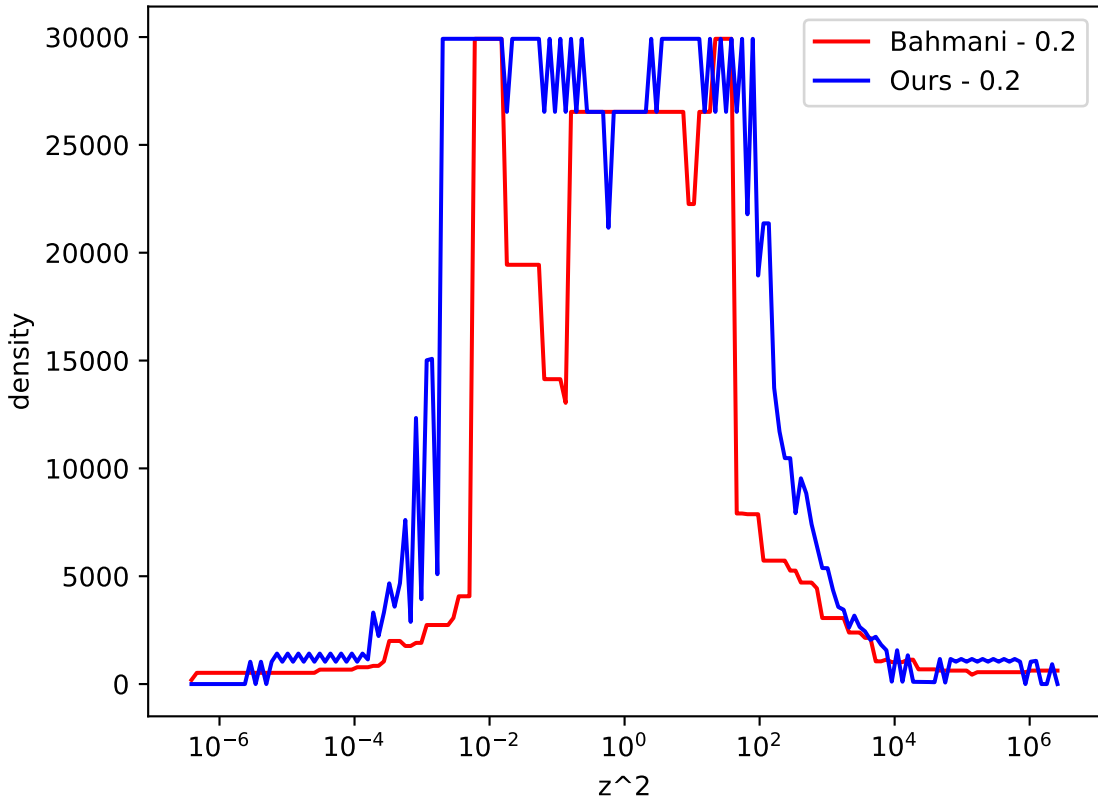

Supplement: supplementary_material [file stackoverflow-den.pdf › DSExperiments/Results/stackoverflow-den.pdf]

# Super User Densities

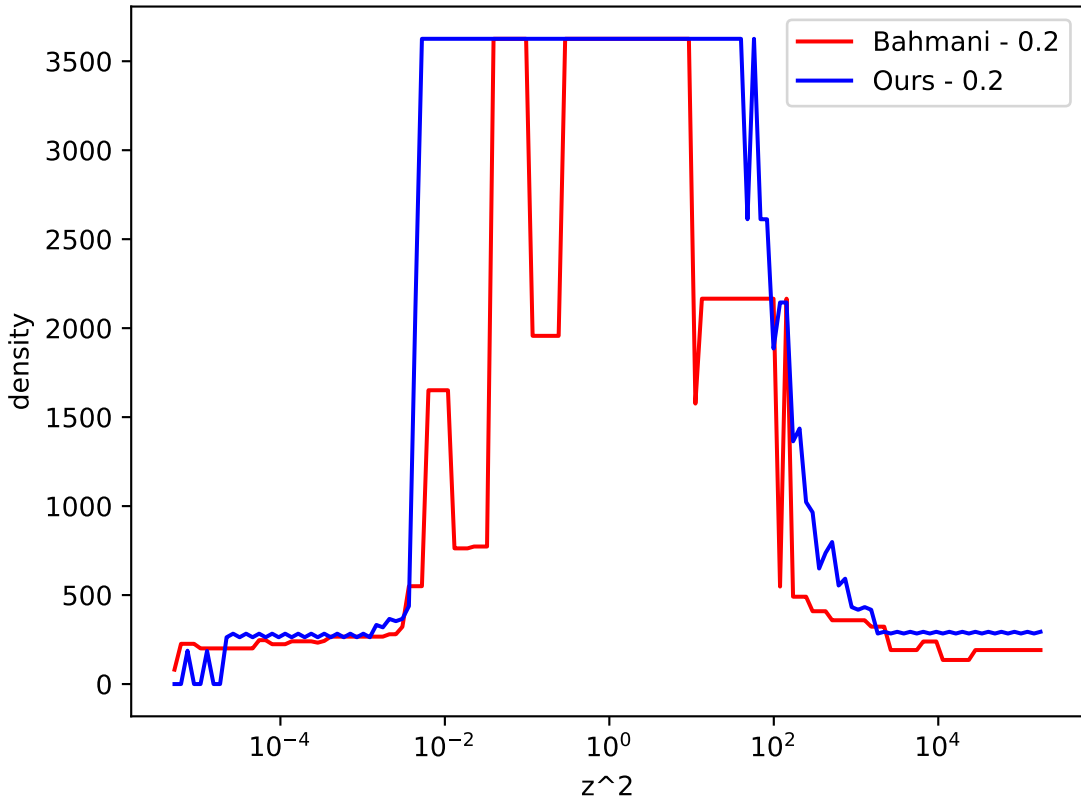

Supplement: supplementary_material [file superuser-den.pdf › DSExperiments/Results/superuser-den.pdf]

Twitter Densities

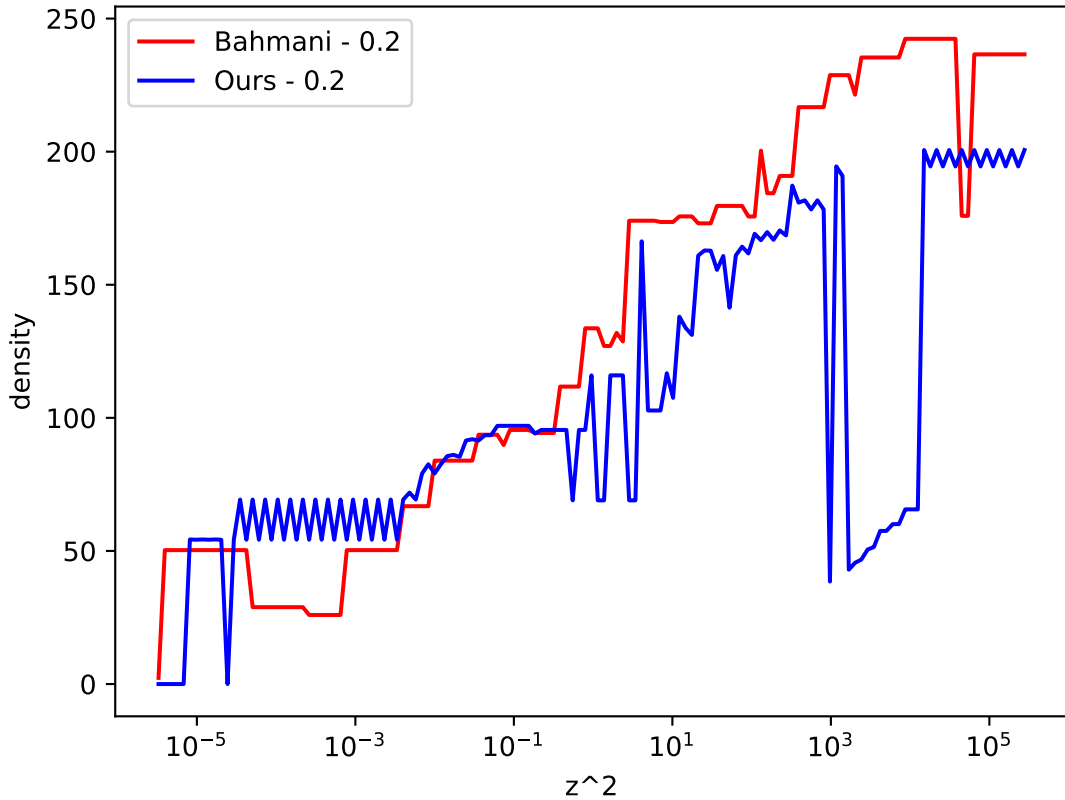

Supplement: supplementary_material [file twitter-den.pdf › DSExperiments/Results/twitter-den.pdf]

Ask Ubuntu Densities

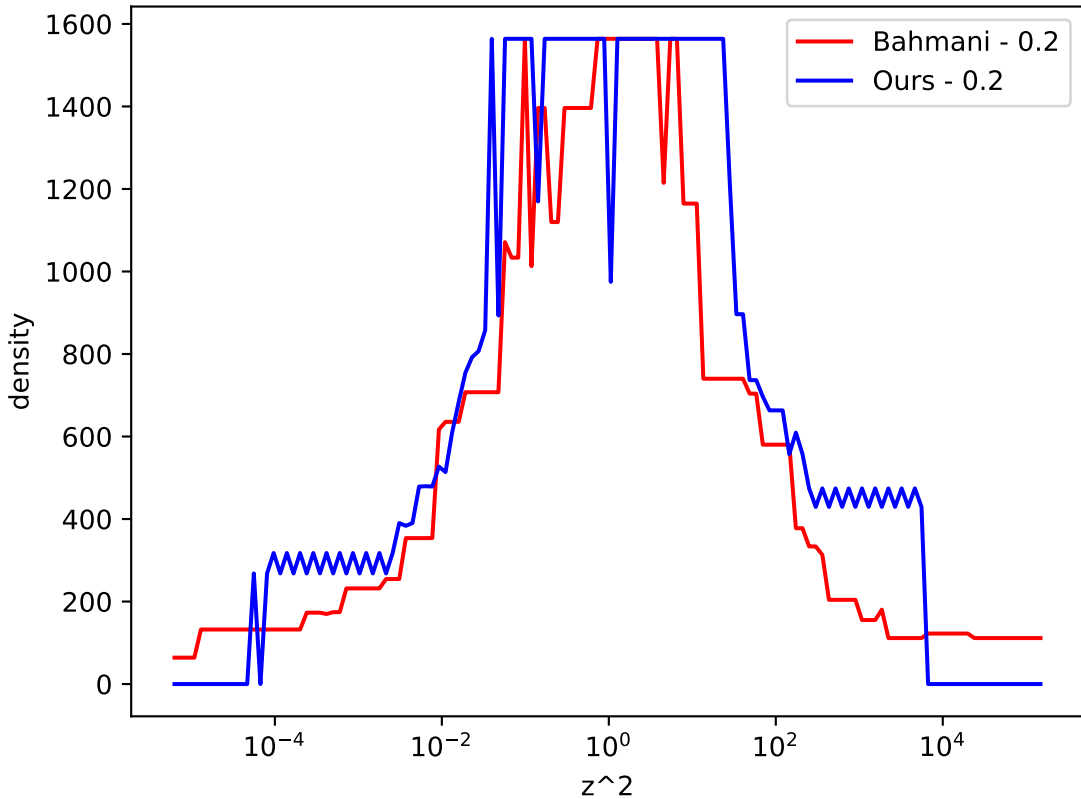

Supplement: supplementary_material [file ubuntu-den.pdf › DSExperiments/Results/ubuntu-den.pdf]

Wikipedia Densities

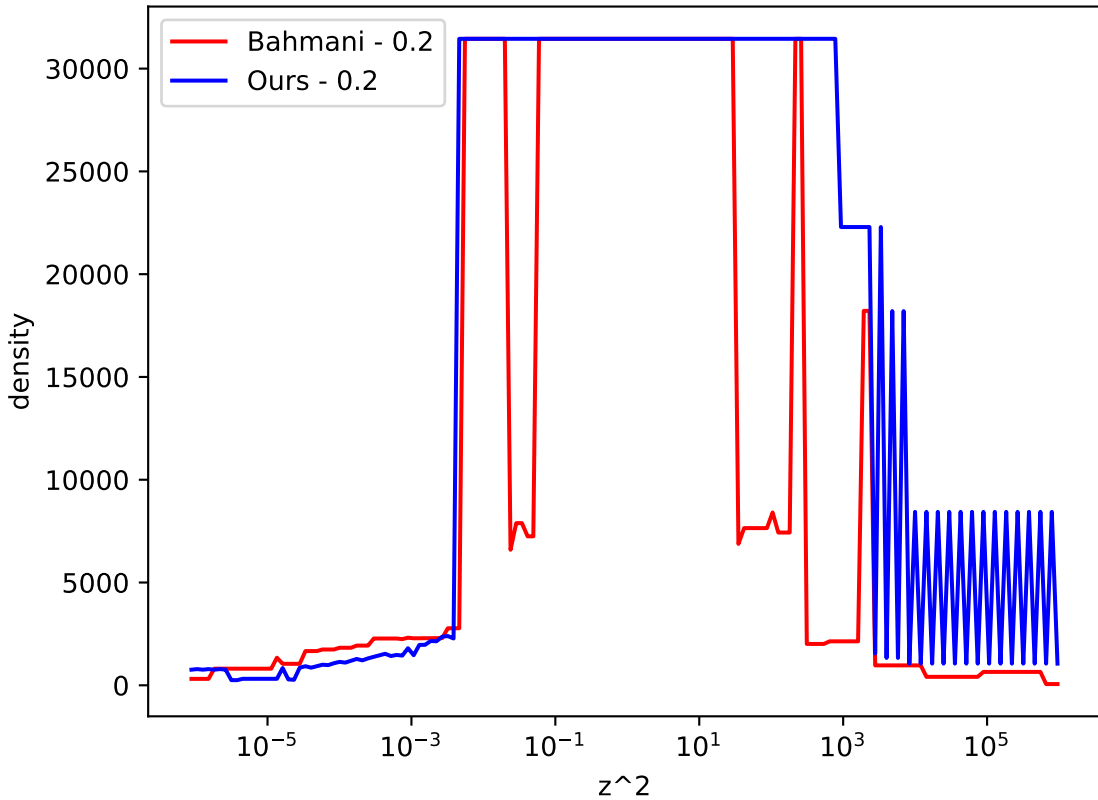

Supplement: supplementary_material [file wiki-talk-den.pdf › DSExperiments/Results/wiki-talk-den.pdf]
